# Supplementary material for: Nanostructured mesoporous gold electrodes detect protein phosphorylation in cancer with electrochemical signal amplification
Source: Royal Society of Chemistry journal article supplement (doi:10.1039/d0an01096k), 2020-01-01
Supplement: d0an01096k1.pdf [file d0an01096k1.pdf]

## Electronic Supplementary Information (ESI)

for

### **Nanostructured mesoporous gold electrodes detect protein phosphorylation in cancer with electrochemical signal amplification**

Emtiaz Ahmed<sup>a,†</sup>, Mostafa Kamal Masud<sup>a,†</sup>, Md. Shahriar A. Hossain<sup>a,b</sup>, Jongbeom Na<sup>a</sup>, Abu  
Ali Ibn Sina<sup>a,\*</sup>, Yusuke Yamauchi<sup>a,c,\*</sup> and Matt Trau<sup>a,d,\*</sup>

*<sup>a</sup>Australian Institute for Bioengineering and Nanotechnology (AIBN), The University of  
Queensland, Brisbane, QLD 4072, Australia*

*<sup>b</sup>School of Mechanical and Mining Engineering Faculty of Engineering, Architecture and  
Information Technology (EAIT), The University of Queensland, Brisbane, QLD 4072,  
Australia.*

*<sup>c</sup>School of Chemical Engineering, Faculty of Engineering, Architecture and Information  
Technology (EAIT), The University of Queensland, Brisbane, QLD 4072, Australia.*

*<sup>d</sup>School of Chemistry and Molecular Biosciences, The University of Queensland, Brisbane,  
QLD 4072, Australia*

*\*Corresponding authors: [a.sina@uq.edu.au](mailto:a.sina@uq.edu.au), [y.yamauchi@uq.edu.au](mailto:y.yamauchi@uq.edu.au) and [m.trau@uq.edu.au](mailto:m.trau@uq.edu.au)*

*<sup>†</sup>Equal Contribution*

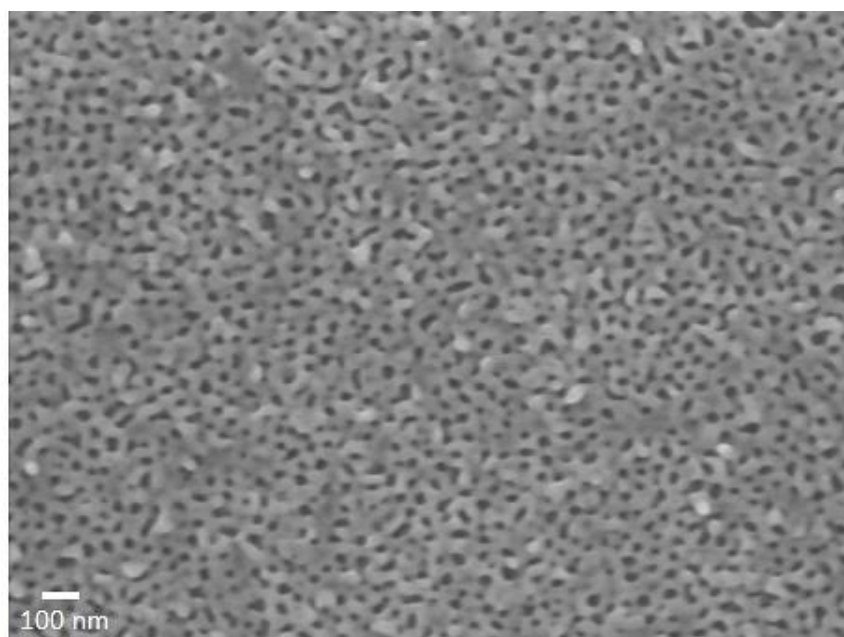

**Figure S1:** The SEM image of the top-surface of NMGE

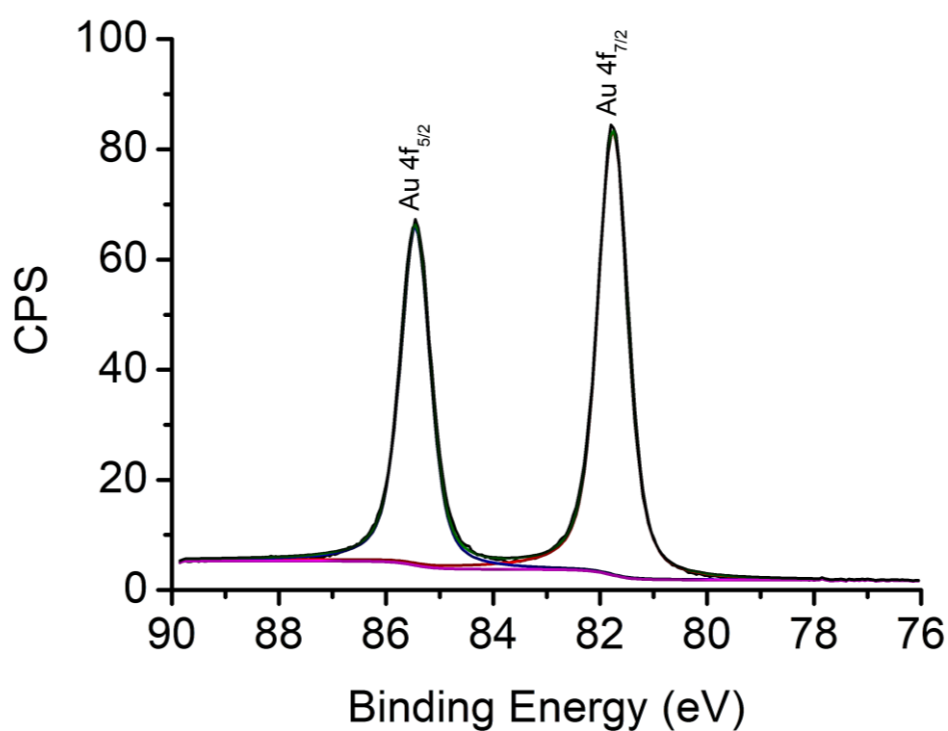

**Figure S2:** The high-resolution XPS spectra of Au-4f.

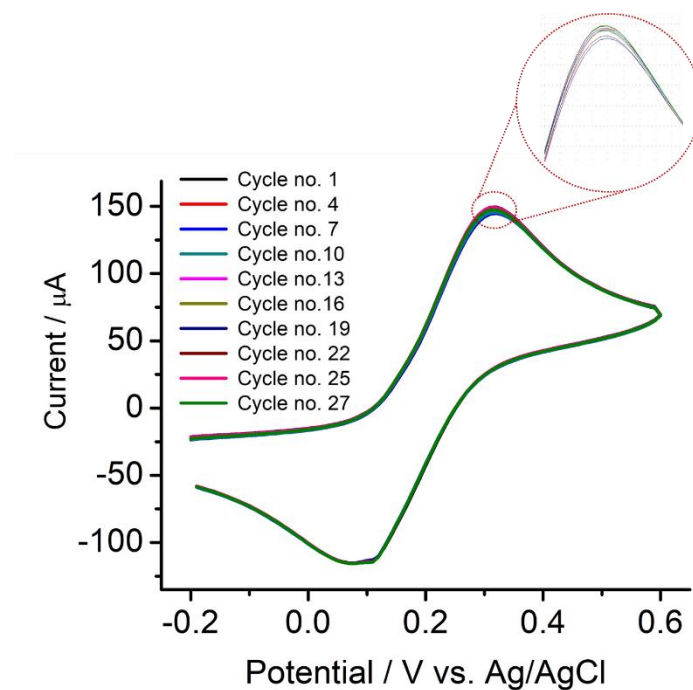

**Figure S3.** Stability of NMGE over several cyclic voltammetric runs in 2.5 mM  $[\text{Fe}(\text{CN})_6]^{3-/4-}$  solution.

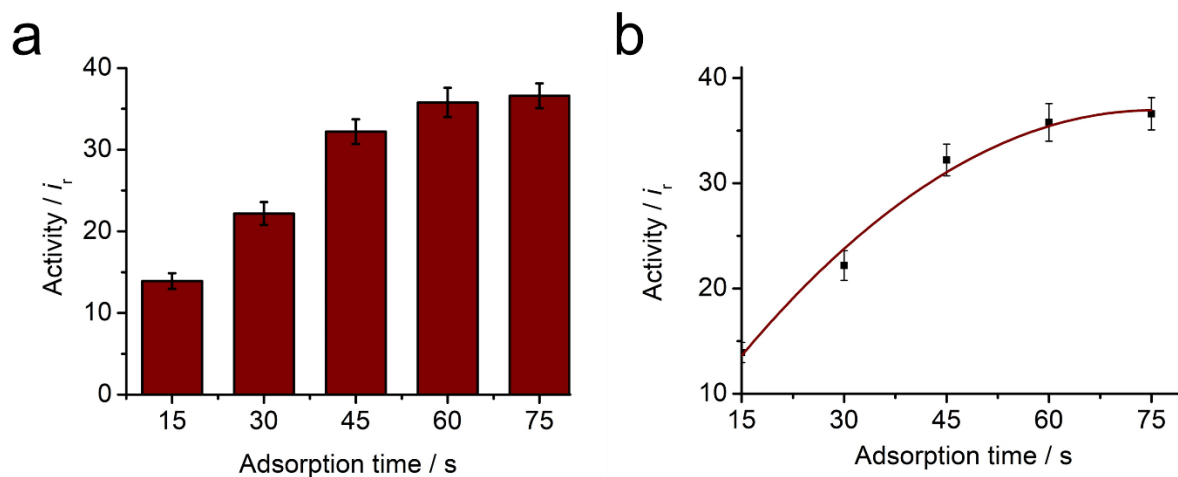

**Figure S4:** Optimisation of adsorption time. (a) and (b) represents the average DPV signals obtained after adsorbing pBRAF for different amounts of time (*i.e.* 15min, 30min, 45min, 60min, and 75min).

**Table S1:** Comparison of the analytical performances in detecting phosphorylated proteins with different methods.

| Methods                                    | Target                                        | Dynamic Range     | LOD           | Reference |
|--------------------------------------------|-----------------------------------------------|-------------------|---------------|-----------|
| Electrochemical biosensor-based detection. | Protein kinase A (PKA).                       | 0.05–100 unit/mL  | 0.014 unit/mL | S1        |
| Zeta potential measurement.                | Abelson murine leukemia viral oncogene kinase | 1 to 40 nM        | 1 nM          | S2        |
| NanoPro Assay                              | phosphorylated ERK 1/2                        | 3.125 to 25 µg/ml | 3.125 µg/ml   | S3        |
| SDS-PAGE                                   | Phosphoprotein (casein)                       | 4 to 500 ng       | 4 ng          | S4        |
| Electrochemical biosensor-based detection. | EGFR/p-EGFR protein                           | 10 to 40 ng/µl    | 10 ng/µl      | S5        |
| Electrochemical biosensor-based detection. | BRAF/p-BRAF protein                           | 0.5 to 20 ng/µl   | 0.5 ng/µl     | This work |

## References

- S1. Y. Zhou, H. Yin, X. Li, Z. Li, S. Ai, and H. Lin, *Biosens. Bioelectron.* 2016, **86**, 508–515.
- S2. F. Yi, X. Huang and J. Ren, *Anal. Chem.* 2018, **90**, 3871–3877.
- S3. N. Padhan, J. Yan, A. Boge, E. Scrivener, H. Birgisson, A. Zieba, M. Gullberg, M. Kamali-Moghaddam, L. Claesson-Welsh and U. Landegren, *Sci. Reports*, 2017, **7**, 1–9.
- S4. S. Y. Hwang and J. K. Choi, *Electrophoresis*, 2017, **38**, 3079–3085.
- S5. M. Ahmed, L. G. Carrascosa, A. A.I. Sina, E. M. Zarate, D. Korbie, K. L. Ru, M. J. A. Shiddiky, P. Mainwaring and M. Trau, *Biosens. Bioelectron.* 2017, **91**, 8–14.
